# Supplementary figures and images for: Mass Spectrometry-Based Comprehensive Analysis of Pancreatic Cyst Fluids
Source: Hindawi journal article supplement (doi:10.1155/2018/7169595), 2018-11-29

Albumin

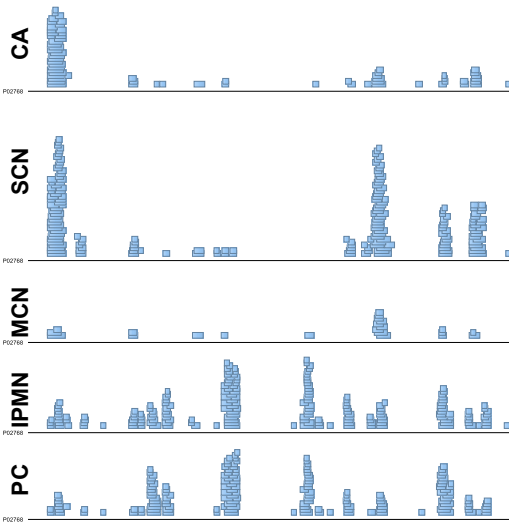

Fibrynogen alpha chain

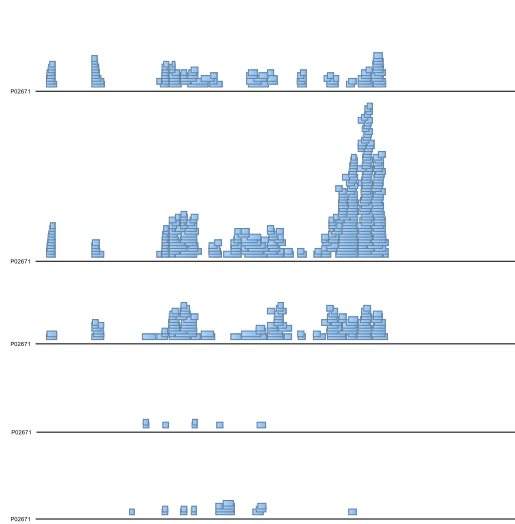

Alpha-1-antitrypsin

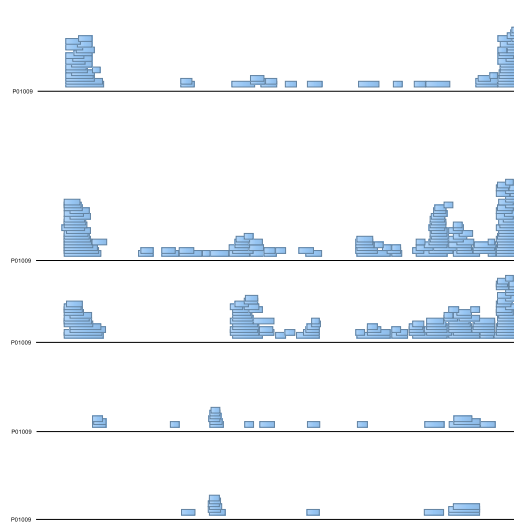

Apolipoprotein A-1

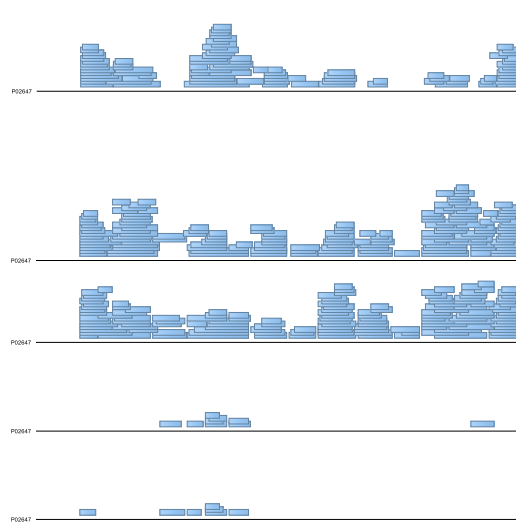

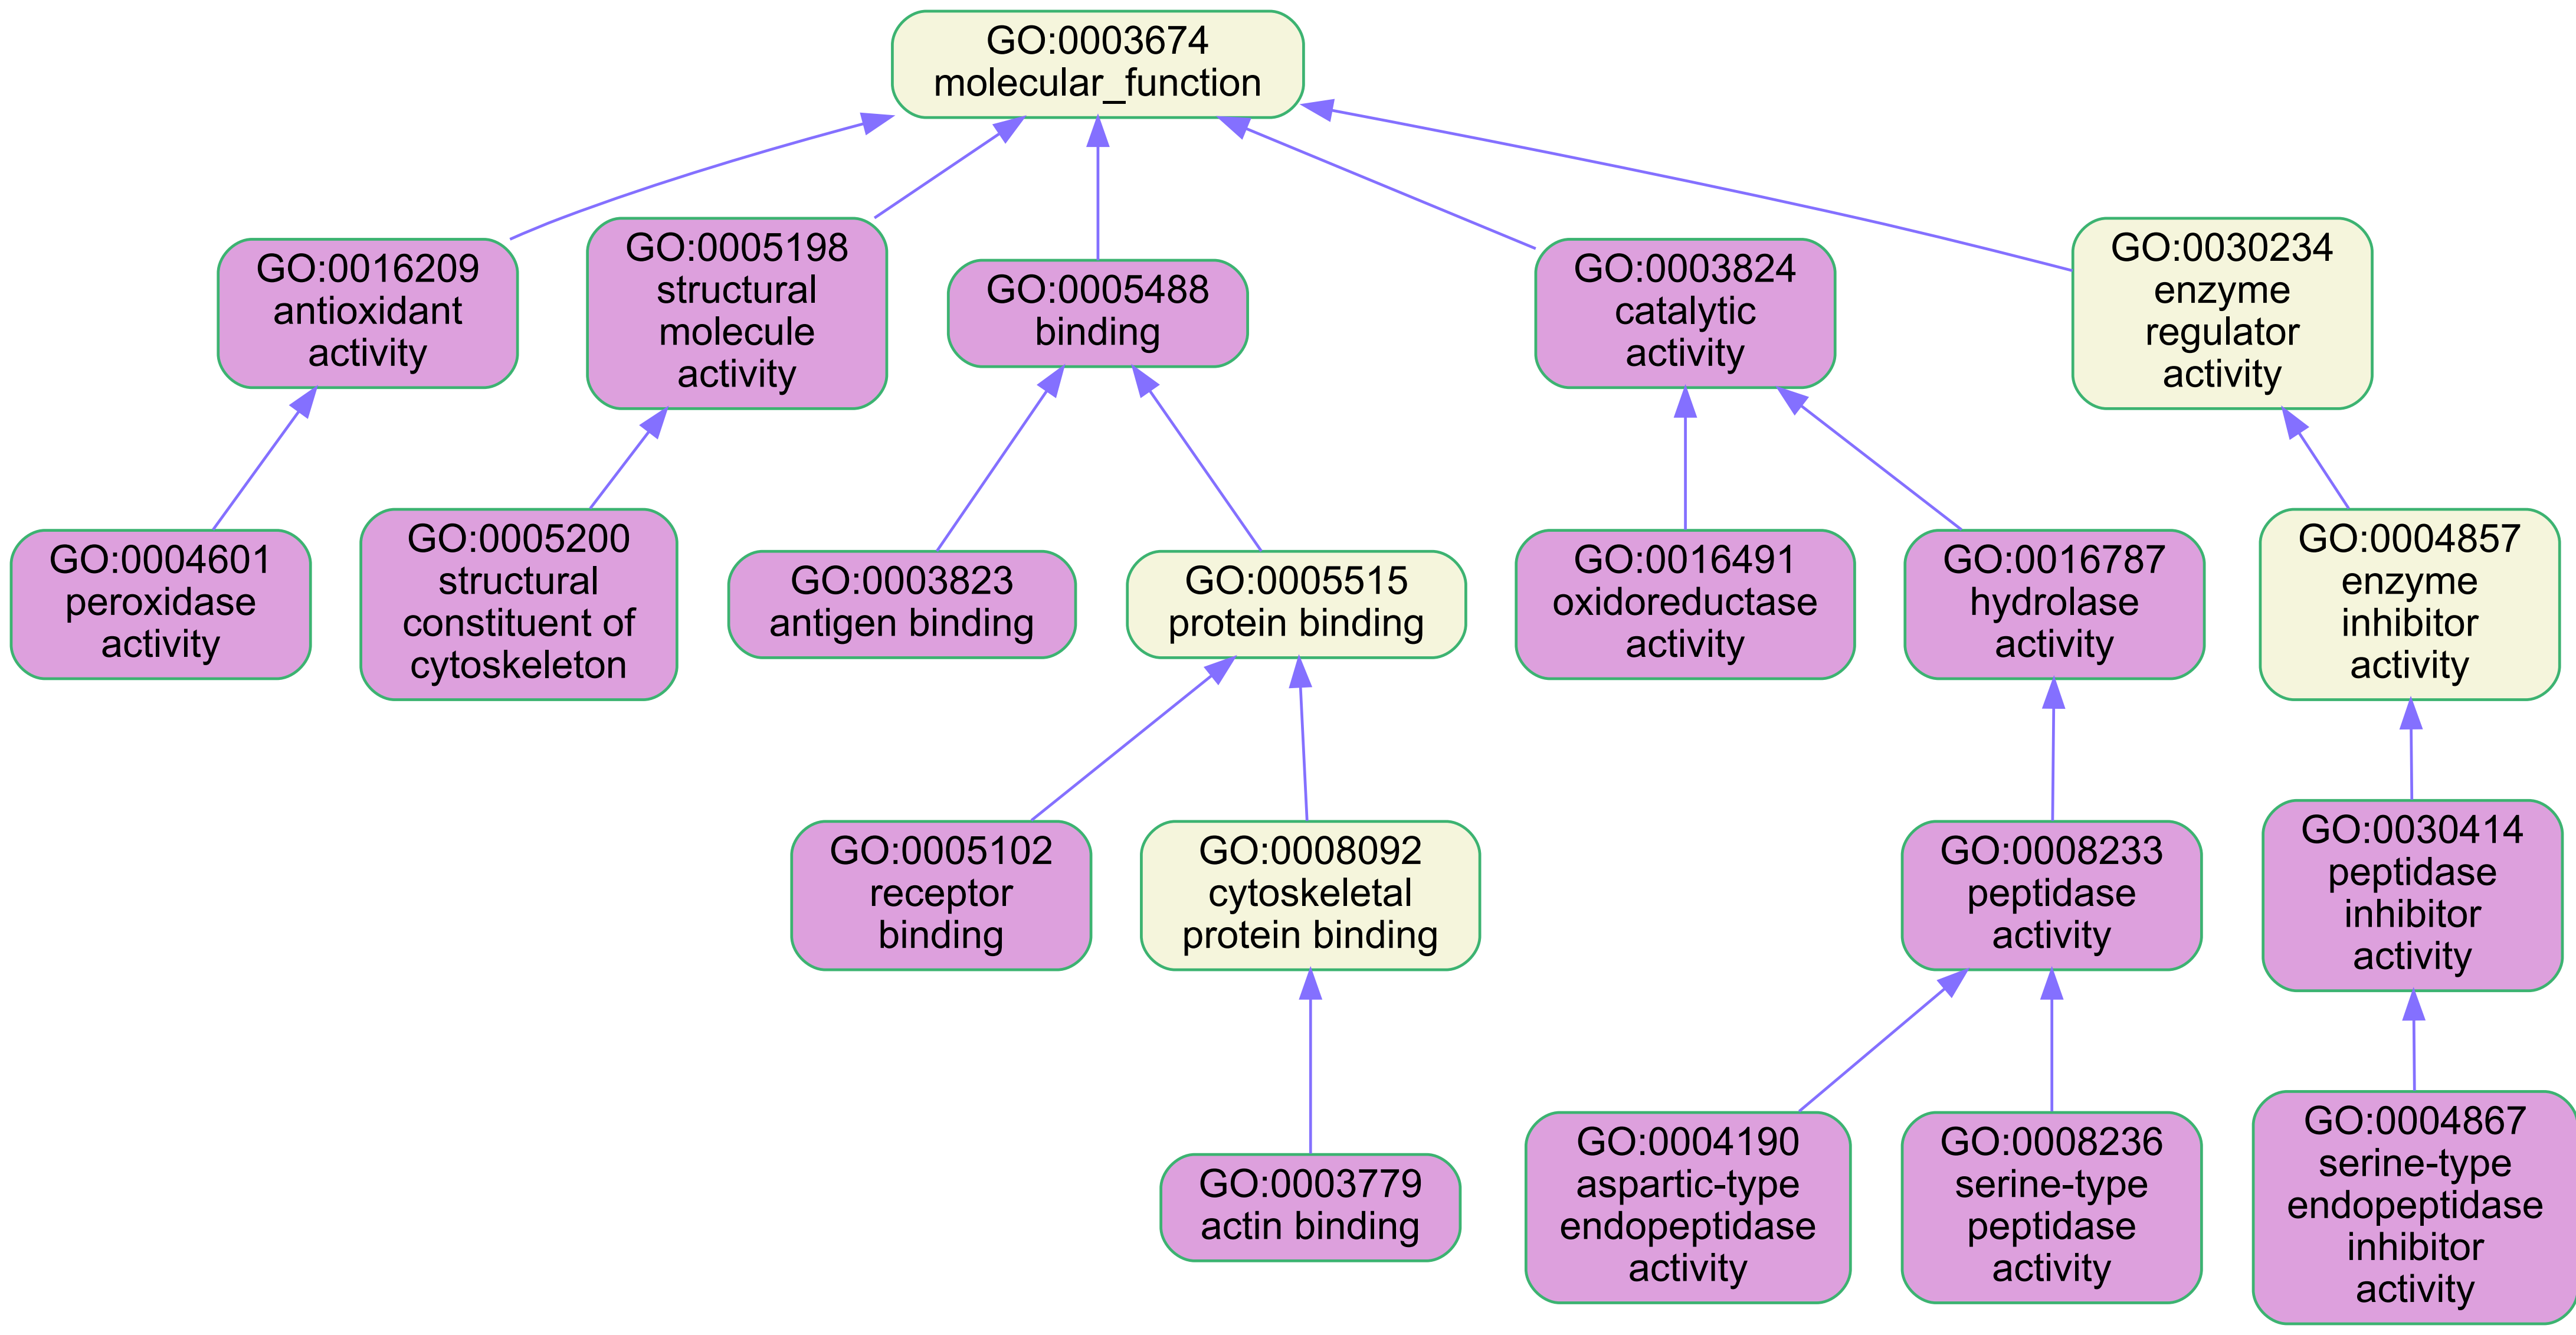

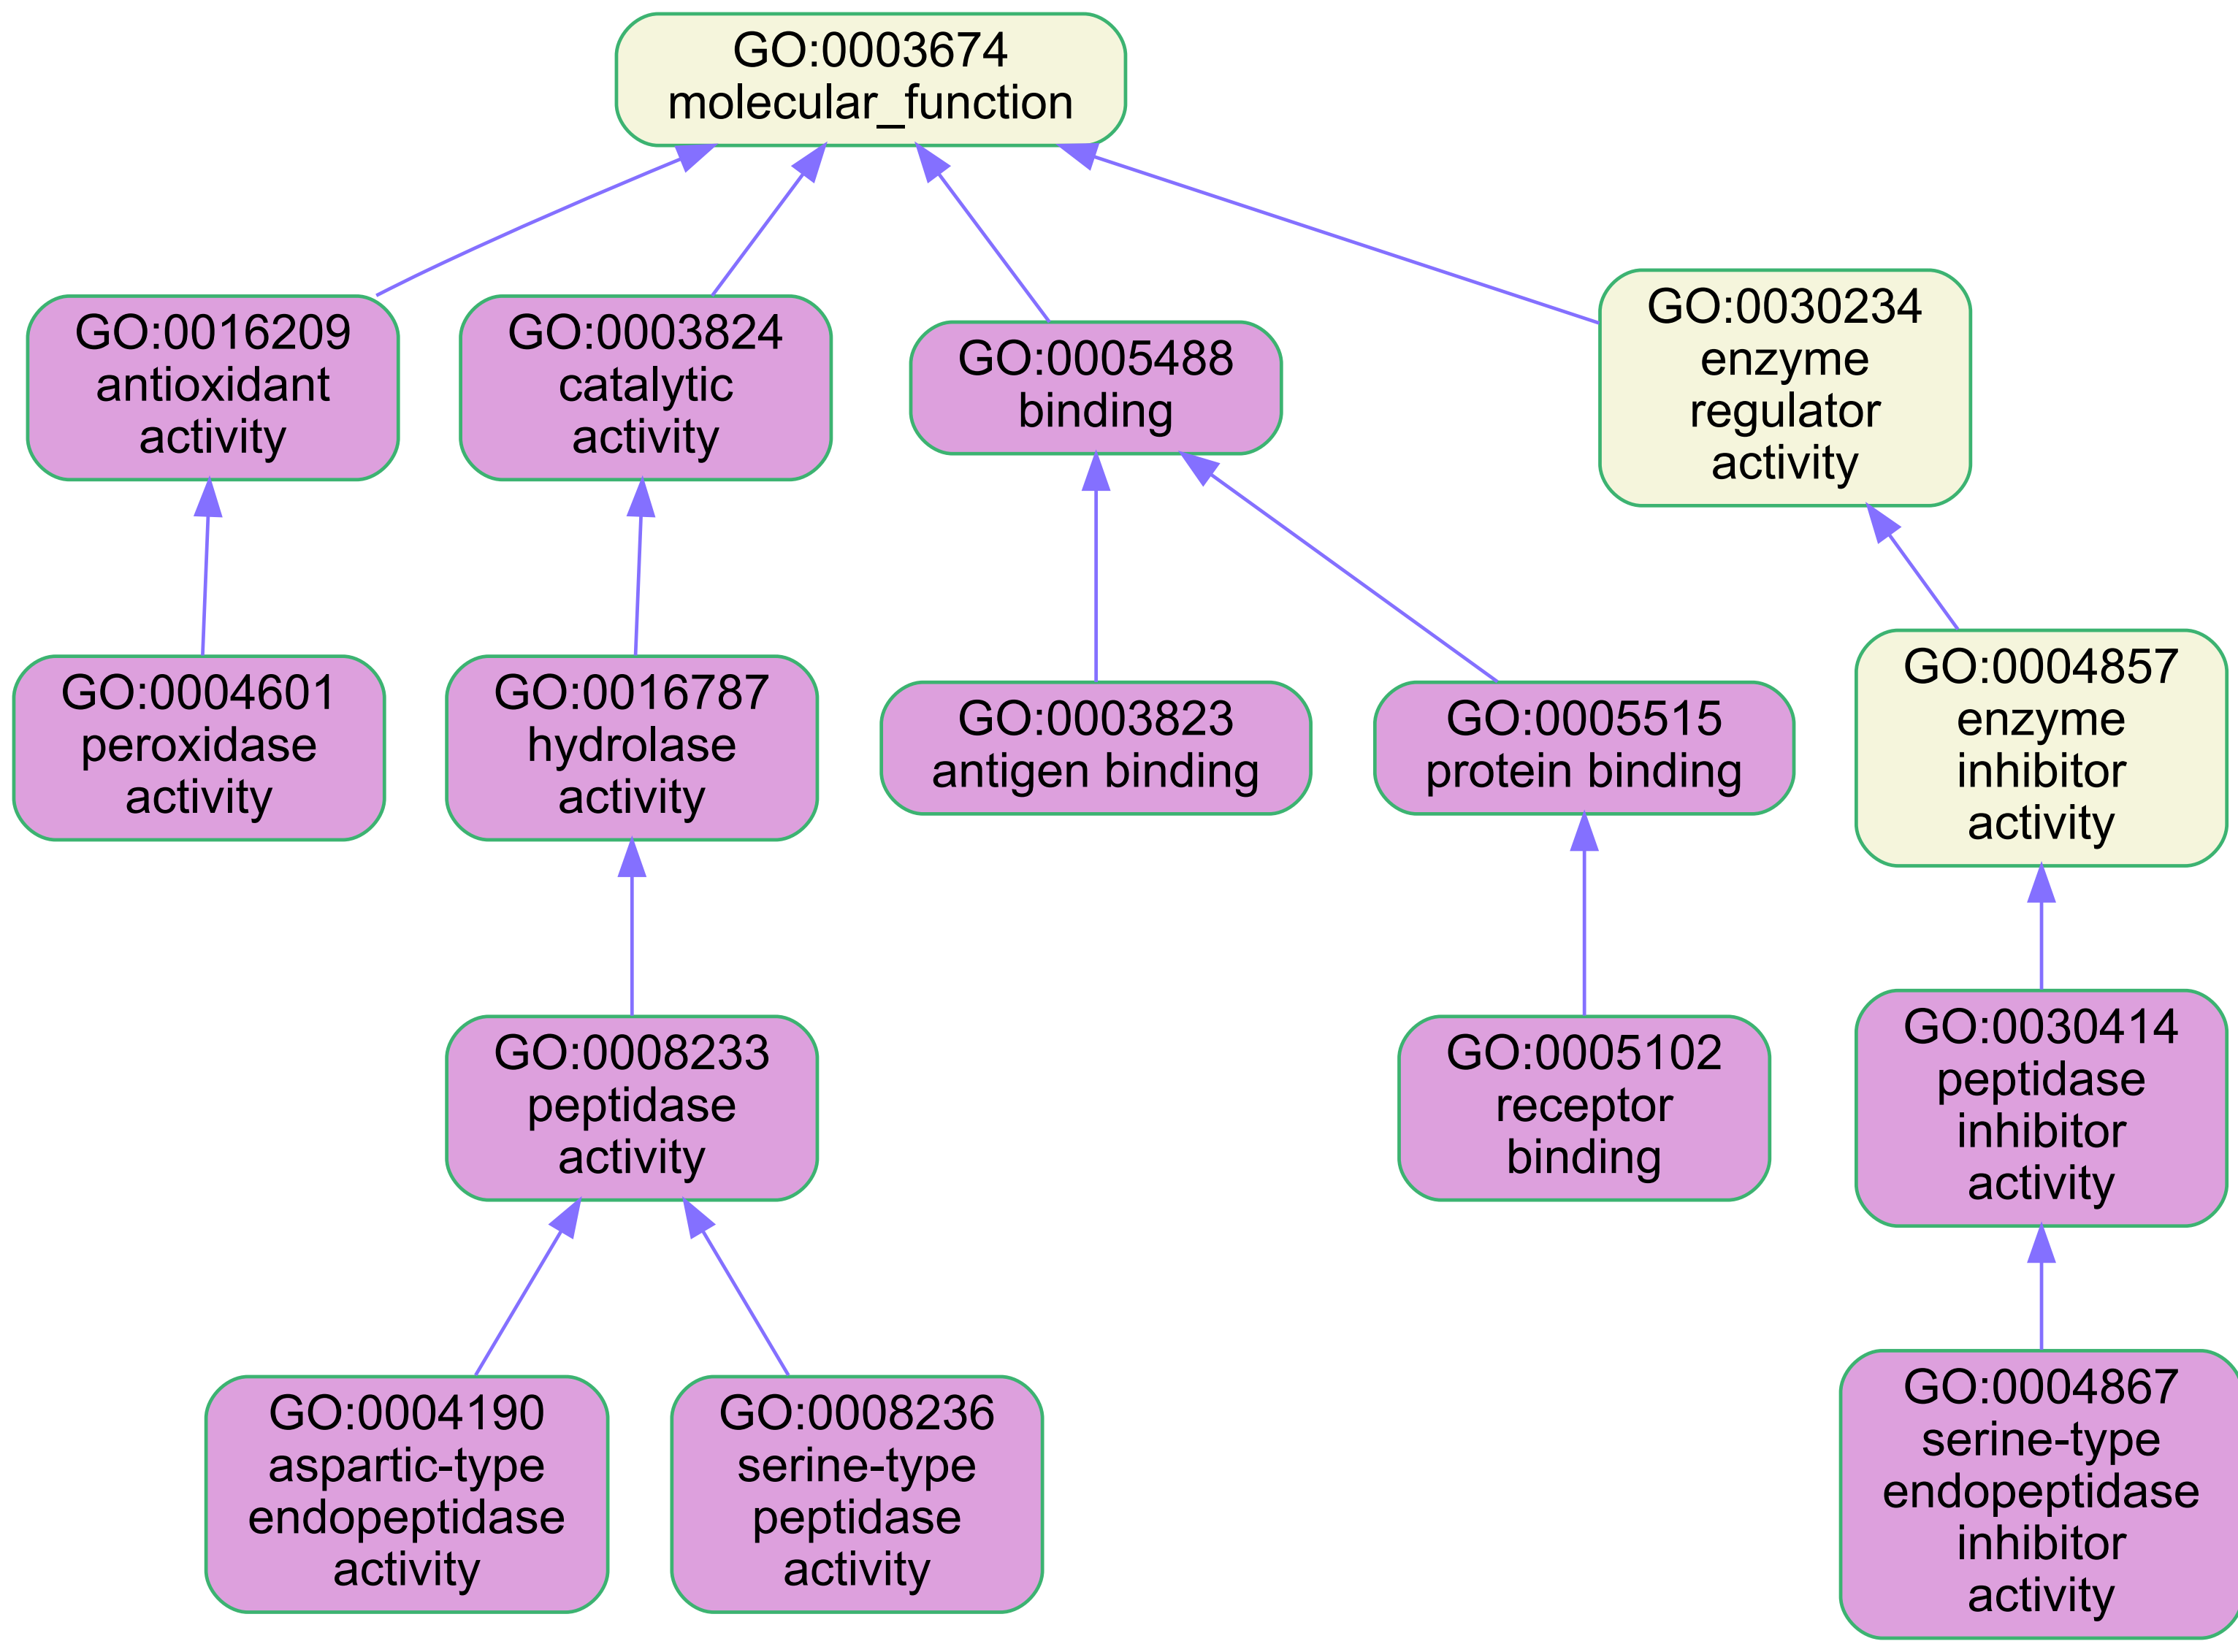

Supplement: f1 [file 7169595.f1.zip]
